# Supplementary material for: DFT/TD-DFT calculations on the sensing mechanism of a dual response near-infrared fluorescent chemosensor for superoxide anion and hydrogen polysulfides: photoinduced electron transfer
Source: Royal Society of Chemistry journal article supplement (doi:10.1039/c6ra23724j), 2016-01-01
Supplement: c6ra23724j1.pdf [file c6ra23724j1.pdf]

## Supporting Information

*for*

### **DFT/TD-DFT calculations on the sensing mechanism of a dual response near-infrared fluorescent chemosensor for superoxide anion and hydrogen polysulfides: Photoinduced electron transfer**

Xiao-Fei Sun, Zhi-Xiang Zhang, Wei Li, Fu-Quan Bai, Jian Wang, Ran Jia, Chui-Peng Kong\* and Hong-Xing Zhang\*

*International Joint Research Laboratory of Nano-Micro Architecture Chemistry, Institute of Theoretical Chemistry, Jilin University, Changchun, 130023, People's Republic of China*

*E-mail: kongerer@jlu.edu.cn; zhanghx@jlu.edu.cn*

**Table S1** The test results of TD-DFT calculation for Keto-Cy

| No. | Functional/Basis    | Solvation model | Energy <sup>a</sup><br>(nm/eV) | <i>f</i> |
|-----|---------------------|-----------------|--------------------------------|----------|
| 1   | PBE1PBE/TZVP        | PCM             | 489/2.54                       | 1.9621   |
| 2   | PBE1PBE/TZVP        | CPCM            | 499/2.49                       | 2.0069   |
| 3   | B3LYP/TZVP          | PCM             | 504/2.46                       | 1.8974   |
| 4   | B3LYP/TZVP          | CPCM            | 514/2.41                       | 1.9475   |
| 5   | BP86/TZVP           | CPCM            | 596/2.08                       | 1.7347   |
| 6   | BP86/6-311G*        | CPCM            | 588/2.11                       | 1.6683   |
| 7   | BP86/6-311++G**     | CPCM            | 600/2.07                       | 1.7727   |
| 8   | B3LYP/6-311++G**    | CPCM            | 520/2.38                       | 1.9568   |
| 9   | B3LYP-D3/TZVP       | CPCM            | 513/2.42                       | 1.9433   |
| 10  | B3LYP-D3/6-311+G*   | CPCM            | 518/2.39                       | 1.9557   |
| 11  | B3LYP-D3/6-311++G** | CPCM            | 519/2.39                       | 1.9524   |

<sup>a</sup> The value of experimental absorption is 535 nm.

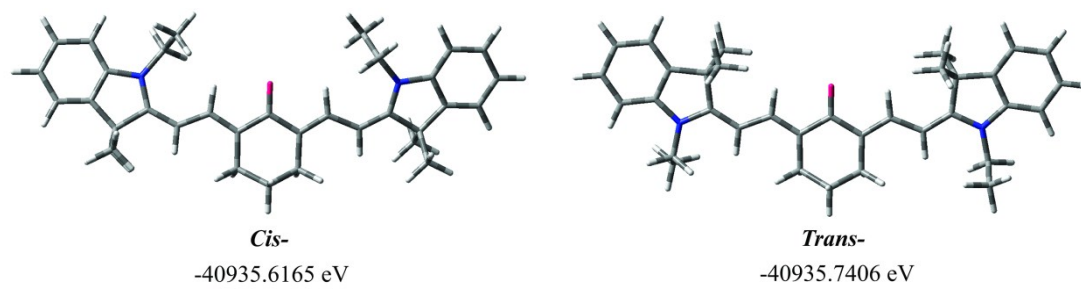

**Fig. S1** The calculated *cis*- and *trans*-configurations and the corresponding absolute free energies of Keto-Cy.

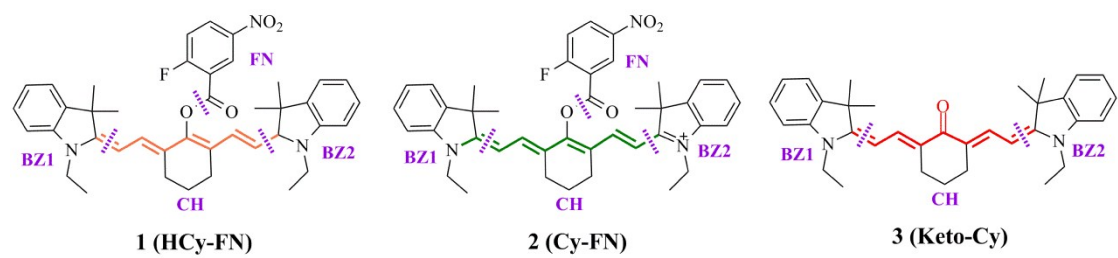

**Fig. S2** The partitioning scheme for the research on MO compositions.

## Appendix: List of coordinates

Coordinates for HCy-FN (ground state)

Coordinates for Cy-FN (ground state)

Coordinates for Keto-Cy (ground state)

Coordinates for HCy-FN (excited state)

Coordinates for Cy-FN (excited state)

Coordinates for Keto-Cy (excited state)

Coordinates for HCy-FN (ground state)

|   |              |             |             |
|---|--------------|-------------|-------------|
| C | -7.17757300  | -1.24136400 | 0.35552300  |
| C | -6.67933900  | 0.01887400  | 0.69503800  |
| C | -7.54219600  | 1.03010200  | 1.07334200  |
| C | -8.91970200  | 0.77633900  | 1.10676400  |
| C | -9.40548900  | -0.48243400 | 0.76064700  |
| C | -8.54299900  | -1.51288600 | 0.37706200  |
| C | -4.90002500  | -1.43264400 | 0.09804500  |
| C | -5.16462400  | 0.01271800  | 0.57085700  |
| H | -7.16235500  | 2.00978100  | 1.34017200  |
| H | -9.60678100  | 1.56055000  | 1.39952000  |
| H | -10.47218400 | -0.67163900 | 0.78396000  |
| H | -8.93692800  | -2.48267300 | 0.10379500  |
| N | -6.11871400  | -2.09074500 | 0.02675500  |
| C | -6.30647800  | -3.47951400 | -0.37908200 |
| C | -6.44733100  | -3.65987300 | -1.89101000 |
| H | -7.19621200  | -3.85131500 | 0.12931400  |
| H | -5.46691800  | -4.06188100 | 0.00094800  |
| H | -6.58518800  | -4.71771800 | -2.12427100 |

|   |             |             |             |
|---|-------------|-------------|-------------|
| H | -7.31141900 | -3.11137400 | -2.27008700 |
| H | -5.55744800 | -3.30785400 | -2.41501300 |
| C | -4.51982700 | 0.29345900  | 1.94557300  |
| C | -4.71656400 | 1.05895800  | -0.47160700 |
| C | 7.15322000  | -1.05448900 | 0.78108900  |
| C | 7.22449200  | -0.36560200 | -0.44125500 |
| C | 8.42430500  | 0.16345400  | -0.87960900 |
| C | 9.57314900  | 0.02308800  | -0.08822800 |
| C | 9.49569800  | -0.65537200 | 1.12550300  |
| C | 8.29041500  | -1.19903500 | 1.57890300  |
| C | 4.94581700  | -0.83048800 | 0.08093800  |
| C | 5.86964800  | -0.42076900 | -1.13021300 |
| H | 8.47939100  | 0.68891700  | -1.82687000 |
| H | 10.51507100 | 0.44404600  | -0.41801400 |
| H | 10.38286100 | -0.75942000 | 1.73988600  |
| H | 8.24967700  | -1.71541000 | 2.52940200  |
| N | 5.87000900  | -1.54306500 | 0.99793700  |
| C | 5.40963900  | -1.90447200 | 2.33594400  |
| C | 5.19732300  | -0.72988300 | 3.29759800  |
| H | 6.13282800  | -2.60472500 | 2.75943800  |
| H | 4.47597400  | -2.45777800 | 2.22008200  |
| H | 4.87450700  | -1.10521500 | 4.27150600  |
| H | 6.11845800  | -0.16226100 | 3.44268300  |
| H | 4.42878200  | -0.04693700 | 2.93058400  |
| C | 5.90865600  | -1.49511400 | -2.23562400 |
| C | 5.42302200  | 0.91604400  | -1.72869000 |
| C | -0.12100200 | 2.57937200  | 1.32587700  |
| C | -0.16603000 | 2.30006200  | -0.04616300 |
| C | -0.30583700 | 3.38432900  | -0.91356900 |
| C | -0.39796000 | 4.66990200  | -0.41197100 |

|   |             |             |             |
|---|-------------|-------------|-------------|
| C | -0.35363500 | 4.93342300  | 0.95445600  |
| C | -0.21257500 | 3.87086800  | 1.82707100  |
| H | -0.34134800 | 3.20524600  | -1.97741900 |
| H | -0.42611600 | 5.94556000  | 1.32413000  |
| H | -0.17019100 | 4.02537400  | 2.89674400  |
| F | 0.01964300  | 1.59562200  | 2.22436400  |
| N | -0.54674100 | 5.78928500  | -1.35216200 |
| O | -0.63169700 | 6.92303900  | -0.89087300 |
| O | -0.57907700 | 5.54099300  | -2.55313500 |
| C | 0.10263000  | -3.82093500 | -1.64959000 |
| C | 1.37163500  | -3.36368400 | -0.93358200 |
| C | 1.27252900  | -1.93849100 | -0.43783800 |
| C | 0.03684700  | -1.39413700 | -0.26852500 |
| C | -1.22937700 | -2.07210900 | -0.41337900 |
| C | -1.14262500 | -3.53106800 | -0.81281100 |
| H | 0.02255300  | -3.29817800 | -2.60800300 |
| H | 1.58664500  | -4.02787500 | -0.08725600 |
| H | -1.12190700 | -4.15283400 | 0.09147900  |
| C | -0.07227300 | 0.94784200  | -0.68007300 |
| O | -0.03559900 | 0.79365300  | -1.87962800 |
| O | -0.03817400 | -0.05563100 | 0.21140400  |
| C | 2.48193400  | -1.19857300 | -0.12711500 |
| C | 3.74217100  | -1.64950500 | -0.25907700 |
| C | -3.71191600 | -2.03557300 | -0.20741700 |
| C | -2.41234900 | -1.44332100 | -0.13961200 |
| H | -3.63314700 | 1.07807700  | -0.58422000 |
| H | -5.16092600 | 0.85069600  | -1.44635000 |
| H | -5.04075600 | 2.05154500  | -0.15284300 |
| H | -3.43172800 | 0.28273900  | 1.88849200  |
| H | -4.83091200 | 1.27815400  | 2.30016800  |

|   |             |             |             |
|---|-------------|-------------|-------------|
| H | -4.83345900 | -0.45011700 | 2.68025500  |
| H | -3.75878800 | -3.06728500 | -0.52888600 |
| H | -2.35583600 | -0.41151700 | 0.17435500  |
| H | -2.03456600 | -3.82363700 | -1.36796900 |
| H | 0.16419800  | -4.88869100 | -1.87125800 |
| H | 2.22466400  | -3.45111200 | -1.60999900 |
| H | 2.35074600  | -0.19763800 | 0.27083200  |
| H | 3.93708400  | -2.64999800 | -0.62852800 |
| H | 6.18113700  | -2.47389000 | -1.83565900 |
| H | 4.93925900  | -1.58391700 | -2.73097000 |
| H | 6.64977100  | -1.21783300 | -2.98801000 |
| H | 6.08216000  | 1.21203600  | -2.54790300 |
| H | 4.40927800  | 0.83612200  | -2.12996400 |
| H | 5.43328200  | 1.70900800  | -0.97815600 |
| H | 4.61207800  | 0.10252900  | 0.55564800  |

Coordinates for Cy-FN (ground state)

|   |             |             |             |
|---|-------------|-------------|-------------|
| C | -7.17822800 | -0.90279200 | -0.16271400 |
| C | -6.62183800 | 0.31618900  | -0.54162000 |
| C | -7.44251200 | 1.39121100  | -0.83293800 |
| C | -8.82796600 | 1.22727900  | -0.73520500 |
| C | -9.36966500 | 0.00151100  | -0.35027900 |
| C | -8.55078300 | -1.08950000 | -0.05523500 |
| C | -4.92181100 | -1.26896800 | -0.12121100 |
| C | -5.11037800 | 0.19426400  | -0.55783000 |
| H | -7.02391600 | 2.34505700  | -1.13130300 |



|   |              |             |             |
|---|--------------|-------------|-------------|
| H | -9.48469200  | 2.05881700  | -0.95847000 |
| H | -10.44426600 | -0.11090800 | -0.27549700 |
| H | -8.98158900  | -2.03375200 | 0.24872600  |
| N | -6.14139400  | -1.82999500 | 0.06582600  |
| C | -6.40159700  | -3.21206900 | 0.48499500  |
| H | -7.35171900  | -3.50524700 | 0.04125900  |
| H | -5.63901600  | -3.84985400 | 0.04216900  |
| C | -6.44277100  | -3.37612400 | 2.00287900  |
| H | -7.22611300  | -2.75740200 | 2.44293500  |
| H | -6.65267100  | -4.41913800 | 2.24620700  |
| H | -5.48821100  | -3.10361000 | 2.45505900  |
| C | -4.48715700  | 1.18707200  | 0.44824100  |
| H | -3.39942600  | 1.13493800  | 0.44771900  |
| H | -4.77657300  | 2.20196600  | 0.17184800  |
| H | -4.84339700  | 0.99136900  | 1.46068000  |
| C | -4.57304900  | 0.43424200  | -1.98672600 |
| H | -4.84228700  | 1.44258800  | -2.30486300 |
| H | -3.48856100  | 0.34298600  | -2.02865300 |
| H | -5.00843600  | -0.27677400 | -2.69045700 |
| C | 7.13776800   | -0.87715900 | 0.07389200  |
| C | 6.59187800   | 0.32750900  | -0.36209000 |
| C | 7.41984600   | 1.39370400  | -0.66488100 |

|   |             |             |             |
|---|-------------|-------------|-------------|
| C | 8.80244900  | 1.23302100  | -0.52880200 |
| C | 9.33409000  | 0.01914400  | -0.09523500 |
| C | 8.50765600  | -1.06207600 | 0.21435900  |
| C | 4.88158200  | -1.24655300 | 0.05693200  |
| C | 5.08134100  | 0.20482100  | -0.41247200 |
| H | 7.00927100  | 2.33767700  | -1.00312000 |
| H | 9.46493400  | 2.05693900  | -0.76306900 |
| H | 10.40685900 | -0.09263600 | 0.00303200  |
| H | 8.93110200  | -2.00066700 | 0.54510000  |
| N | 6.09354500  | -1.78965400 | 0.32710300  |
| C | 6.34309700  | -3.16033500 | 0.78877800  |
| H | 7.23414500  | -3.12834100 | 1.41395200  |
| H | 5.51827700  | -3.45635700 | 1.43376700  |
| C | 6.52583300  | -4.15085000 | -0.35930900 |
| H | 7.37219300  | -3.87129800 | -0.98830200 |
| H | 6.71724400  | -5.14416000 | 0.05033000  |
| H | 5.63124100  | -4.20258400 | -0.98140400 |
| C | 4.57991300  | 0.41002600  | -1.85920500 |
| H | 4.85591900  | 1.41103000  | -2.19430200 |
| H | 5.03404800  | -0.31638800 | -2.53476800 |
| H | 3.49700200  | 0.31560800  | -1.92674500 |
| C | 4.43346400  | 1.22107300  | 0.55460800  |

|   |             |             |             |
|---|-------------|-------------|-------------|
| H | 4.72942600  | 2.22927600  | 0.26129900  |
| H | 3.34606800  | 1.16796200  | 0.52900500  |
| H | 4.76519300  | 1.04943500  | 1.57968300  |
| C | -0.01528300 | -4.39141100 | -0.01986700 |
| C | 1.23880800  | -3.67502000 | 0.47669100  |
| C | 1.22860700  | -2.20214100 | 0.12468100  |
| C | -0.01905700 | -1.58375300 | -0.03711100 |
| C | -1.26932400 | -2.20644200 | 0.08374000  |
| C | -1.28386300 | -3.67763400 | 0.44267200  |
| H | -0.00065700 | -4.42765100 | -1.11350800 |
| H | 1.32162100  | -3.78624600 | 1.56452000  |
| C | -3.73946800 | -1.97940000 | 0.07090100  |
| H | -3.83882200 | -3.00409600 | 0.39897100  |
| C | -2.44936200 | -1.48019700 | -0.10133200 |
| H | -2.33943100 | -0.44927900 | -0.40049900 |
| H | -2.15515700 | -4.15857100 | -0.00405800 |
| H | -1.39266100 | -3.78451000 | 1.52856000  |
| H | -0.01887000 | -5.42367900 | 0.33567800  |
| H | 2.12233800  | -4.15106200 | 0.04917100  |
| C | 2.41110900  | -1.46897100 | -0.01368200 |
| H | 2.30694600  | -0.43566500 | -0.30689200 |
| C | 3.69646600  | -1.96453500 | 0.19842600  |

|   |             |             |             |
|---|-------------|-------------|-------------|
| H | 3.79014700  | -2.99480400 | 0.50986300  |
| C | -0.01090700 | 2.11463800  | 0.03500400  |
| C | 0.07440000  | 3.13629200  | 0.98238100  |
| C | 0.10705500  | 4.45793600  | 0.57737900  |
| C | 0.05624200  | 4.81894100  | -0.76632500 |
| C | -0.03140100 | 3.81901700  | -1.71668500 |
| C | -0.06367900 | 2.49128800  | -1.31363000 |
| H | 0.11494200  | 2.88102200  | 2.03046900  |
| H | 0.08301400  | 5.85804300  | -1.05947900 |
| H | -0.07606800 | 4.05087500  | -2.77218700 |
| F | -0.15632700 | 1.57077200  | -2.28173800 |
| N | 0.19572100  | 5.51102200  | 1.59888200  |
| O | 0.24872600  | 5.17550000  | 2.77752700  |
| O | 0.21192100  | 6.67861700  | 1.22310000  |
| C | -0.04001300 | 0.71972200  | 0.56541700  |
| O | -0.07486600 | 0.46216400  | 1.74465500  |
| O | -0.01284400 | -0.21944100 | -0.40591100 |

Coordinates for Keto-Cy (ground state)

|   |            |             |            |
|---|------------|-------------|------------|
| C | 7.17417100 | -0.20407700 | 0.19977000 |
| C | 6.60542200 | -1.47622300 | 0.11924300 |
| C | 7.41330000 | -2.59804800 | 0.09629600 |

|   |             |             |             |
|---|-------------|-------------|-------------|
| C | 8.80348700  | -2.43765400 | 0.15085300  |
| C | 9.35864200  | -1.16210800 | 0.22679100  |
| C | 8.55239900  | -0.02130400 | 0.25106300  |
| C | 4.91165800  | 0.18278300  | 0.12491600  |
| C | 5.09223100  | -1.34831700 | 0.07353500  |
| H | 6.98150000  | -3.59043400 | 0.03566200  |
| H | 9.44821400  | -3.30757400 | 0.13141000  |
| H | 10.43522200 | -1.04616200 | 0.26463700  |
| H | 8.99649100  | 0.96369500  | 0.30320500  |
| N | 6.15922700  | 0.76020100  | 0.22058100  |
| C | 6.42747200  | 2.19487400  | 0.28611600  |
| C | 6.54215900  | 2.85356900  | -1.08865300 |
| H | 7.35219300  | 2.32680400  | 0.84737400  |
| H | 5.63696000  | 2.66200000  | 0.87310800  |
| H | 6.74451200  | 3.91974600  | -0.96838000 |
| H | 7.35783400  | 2.41375900  | -1.66500000 |
| H | 5.61758200  | 2.74294500  | -1.65695400 |
| C | 4.46341200  | -2.04188400 | 1.30177400  |
| C | 4.54873100  | -1.95200600 | -1.23920300 |
| C | -7.18066300 | -0.19144600 | -0.06468000 |
| C | -6.61148200 | -1.46482900 | -0.11750900 |
| C | -7.41997200 | -2.58566800 | -0.15970100 |

|   |              |             |             |
|---|--------------|-------------|-------------|
| C | -8.81090000  | -2.42324500 | -0.14357700 |
| C | -9.36627300  | -1.14685300 | -0.08475700 |
| C | -8.55946800  | -0.00699000 | -0.04247800 |
| C | -4.91621800  | 0.19186500  | -0.06036200 |
| C | -5.09745400  | -1.33876300 | -0.12233000 |
| H | -6.98804300  | -3.57885400 | -0.20412500 |
| H | -9.45603800  | -3.29250400 | -0.17525400 |
| H | -10.44329000 | -1.02986200 | -0.06884800 |
| H | -9.00293700  | 0.97827500  | 0.01010900  |
| N | -6.16579600  | 0.77284900  | -0.04803400 |
| C | -6.43432300  | 2.20782400  | 0.00430800  |
| C | -6.49391300  | 2.76424400  | 1.42681200  |
| H | -7.38059000  | 2.37935200  | -0.50843800 |
| H | -5.66719800  | 2.71820100  | -0.57782000 |
| H | -6.70333400  | 3.83528300  | 1.39200900  |
| H | -7.28481700  | 2.28056500  | 2.00263400  |
| H | -5.54696200  | 2.61833400  | 1.94863800  |
| C | -4.51868200  | -1.93411000 | -1.42426800 |
| C | -4.50342200  | -2.04125400 | 1.11751100  |
| C | 0.00495500   | 3.21017800  | -0.66287400 |
| C | -1.24781600  | 2.63158400  | -0.01196600 |
| C | -1.26812300  | 1.11971600  | -0.05966600 |

|   |             |             |             |
|---|-------------|-------------|-------------|
| C | 0.00024700  | 0.36666500  | -0.07927000 |
| C | 1.26921000  | 1.11723500  | -0.03434900 |
| C | 1.25662500  | 2.63023800  | -0.01162700 |
| H | 0.00422700  | 2.97409400  | -1.73257000 |
| H | -1.29375900 | 2.97557600  | 1.03049400  |
| H | 1.31239500  | 2.98906600  | 1.02544000  |
| O | -0.00037700 | -0.88972400 | -0.12413200 |
| C | -2.43341600 | 0.40150400  | -0.06724300 |
| C | -3.75560600 | 0.92264500  | -0.02305200 |
| C | 3.75299500  | 0.91662400  | 0.08525300  |
| C | 2.43198100  | 0.39612900  | 0.01119200  |
| H | 3.46414800  | -1.86998100 | -1.29965200 |
| H | 4.98179300  | -1.45090000 | -2.10657200 |
| H | 4.81253100  | -3.01012600 | -1.28751700 |
| H | 3.37815400  | -1.94611800 | 1.30230100  |
| H | 4.71172800  | -3.10477700 | 1.28520100  |
| H | 4.84836800  | -1.61399700 | 2.22898100  |
| H | 3.85814400  | 1.99303500  | 0.11401500  |
| H | 2.30471900  | -0.67756800 | -0.00717200 |
| H | 2.14601000  | 3.01859800  | -0.51295200 |
| H | 0.00621000  | 4.29971300  | -0.57402500 |
| H | -2.13731700 | 3.03381000  | -0.50192300 |

|   |             |             |             |
|---|-------------|-------------|-------------|
| H | -2.30743300 | -0.67173400 | -0.10948600 |
| H | -3.86033600 | 1.99711700  | 0.04707200  |
| H | -4.92959200 | -1.42829800 | -2.29967400 |
| H | -3.43305200 | -1.84892300 | -1.45510700 |
| H | -4.77889200 | -2.99242200 | -1.48576300 |
| H | -4.75553700 | -3.10300500 | 1.08871200  |
| H | -3.41822200 | -1.95059900 | 1.14748000  |
| H | -4.91079500 | -1.61709000 | 2.03677500  |

Coordinates for HCy-FN (excited state)

|   |              |             |            |
|---|--------------|-------------|------------|
| C | -7.01527900  | -1.42952300 | 0.41469700 |
| C | -6.55457600  | -0.18947500 | 0.84892100 |
| C | -7.45451300  | 0.76323500  | 1.29401300 |
| C | -8.81606200  | 0.45074600  | 1.29147000 |
| C | -9.26128200  | -0.79636400 | 0.84929100 |
| C | -8.36396900  | -1.76329800 | 0.40054800 |
| C | -4.75210800  | -1.54027100 | 0.16378400 |
| C | -5.04533700  | -0.14596800 | 0.73192000 |
| H | -7.11532800  | 1.73304300  | 1.63699300 |
| H | -9.53467100  | 1.18410800  | 1.63517800 |
| H | -10.32074700 | -1.01955100 | 0.85188300 |
| H | -8.71625300  | -2.72510800 | 0.05435700 |



|   |             |             |             |
|---|-------------|-------------|-------------|
| N | -5.91041300 | -2.21577200 | 0.02447400  |
| C | -6.06772000 | -3.57877300 | -0.50801100 |
| C | -6.23734300 | -3.59981300 | -2.02509800 |
| H | -6.93564700 | -4.01068200 | -0.01393300 |
| H | -5.20519100 | -4.16462200 | -0.19986700 |
| H | -6.36664600 | -4.63249300 | -2.35253100 |
| H | -7.11559100 | -3.03027000 | -2.33141800 |
| H | -5.36021900 | -3.18715400 | -2.52499600 |
| C | -4.40507700 | 0.04489600  | 2.12635900  |
| C | -4.61901300 | 0.97798200  | -0.23998200 |
| C | 7.27180900  | -0.85520300 | 0.71392500  |
| C | 7.27361800  | -0.13085800 | -0.48816400 |
| C | 8.44184600  | 0.43440900  | -0.96572900 |
| C | 9.62823700  | 0.28988500  | -0.23366900 |
| C | 9.61966100  | -0.42626800 | 0.96075100  |
| C | 8.44661000  | -1.00499100 | 1.45287600  |
| C | 5.03350900  | -0.65996500 | 0.12353700  |
| C | 5.89094300  | -0.18963000 | -1.11934100 |
| H | 8.44280900  | 0.98898400  | -1.89768100 |
| H | 10.54659500 | 0.73685500  | -0.59406200 |
| H | 10.53657300 | -0.53326000 | 1.52905400  |
| H | 8.45875400  | -1.55035100 | 2.38782600  |

|   |             |             |             |
|---|-------------|-------------|-------------|
| N | 6.00657900  | -1.37210000 | 0.97868400  |
| C | 5.61171600  | -1.76257200 | 2.33144100  |
| C | 5.42256800  | -0.60622200 | 3.31884900  |
| H | 6.36585200  | -2.45547500 | 2.70979600  |
| H | 4.68479500  | -2.33326800 | 2.24958100  |
| H | 5.15188800  | -1.00231500 | 4.30025300  |
| H | 6.33913100  | -0.02396300 | 3.43038200  |
| H | 4.62546500  | 0.06740100  | 2.99871000  |
| C | 5.89795200  | -1.22757600 | -2.25963700 |
| C | 5.39098000  | 1.15681900  | -1.64918900 |
| C | 0.11362700  | 2.67149500  | 1.15909600  |
| C | -0.25008900 | 2.30647500  | -0.14123000 |
| C | -0.85746400 | 3.26774700  | -0.95112800 |
| C | -1.11418500 | 4.55690000  | -0.47426600 |
| C | -0.73574200 | 4.89262700  | 0.83948800  |
| C | -0.11796200 | 3.95052200  | 1.64195600  |
| H | -1.14791000 | 3.00597600  | -1.95578700 |
| H | -0.92800000 | 5.88723000  | 1.21111400  |
| H | 0.19044400  | 4.19649200  | 2.64980400  |
| F | 0.74471000  | 1.79492200  | 1.98335000  |
| N | -1.74983000 | 5.49648100  | -1.29571000 |
| O | -1.98221500 | 6.68623600  | -0.83858200 |

|   |             |             |             |
|---|-------------|-------------|-------------|
| O | -2.09476000 | 5.16377800  | -2.49941000 |
| C | 0.32198400  | -3.79217200 | -1.63175400 |
| C | 1.54980600  | -3.31195400 | -0.86440500 |
| C | 1.41652700  | -1.88071200 | -0.41313300 |
| C | 0.14836500  | -1.35445600 | -0.26077400 |
| C | -1.05862800 | -2.08283000 | -0.40360000 |
| C | -0.95607900 | -3.52188000 | -0.84359400 |
| H | 0.27147700  | -3.27428100 | -2.59381900 |
| H | 1.70940000  | -3.94027800 | 0.02060200  |
| H | -0.98110400 | -4.15777300 | 0.04993800  |
| C | -0.05895600 | 0.96239000  | -0.74152700 |
| O | -0.02573500 | 0.74527100  | -1.93033600 |
| O | 0.03300400  | -0.02553800 | 0.18969100  |
| C | 2.57992400  | -1.09247900 | -0.10125500 |
| C | 3.85636800  | -1.51588900 | -0.20629300 |
| C | -3.51864600 | -2.10878600 | -0.17826100 |
| C | -2.28210500 | -1.48305200 | -0.08256500 |
| H | -3.53622700 | 1.04358600  | -0.32982000 |
| H | -5.04333700 | 0.81786900  | -1.23203700 |
| H | -4.98473100 | 1.93145500  | 0.14261600  |
| H | -3.31773600 | 0.06231500  | 2.06884700  |
| H | -4.73968900 | 0.99622600  | 2.54168200  |

|   |             |             |             |
|---|-------------|-------------|-------------|
| H | -4.70532600 | -0.75391800 | 2.80580700  |
| H | -3.54327600 | -3.12184200 | -0.55080000 |
| H | -2.24272000 | -0.46741100 | 0.27738900  |
| H | -1.82620700 | -3.79412800 | -1.44118200 |
| H | 0.40883500  | -4.85915700 | -1.84206700 |
| H | 2.44195000  | -3.41935300 | -1.48138400 |
| H | 2.40938500  | -0.08845600 | 0.26831400  |
| H | 4.08176400  | -2.51981700 | -0.54633100 |
| H | 6.20952000  | -2.21220600 | -1.90566400 |
| H | 4.90845200  | -1.32035200 | -2.71324400 |
| H | 6.59694700  | -0.90941600 | -3.03548900 |
| H | 6.00743600  | 1.49133100  | -2.48640300 |
| H | 4.36205300  | 1.07026600  | -2.00760000 |
| H | 5.42158300  | 1.92384500  | -0.87299700 |
| H | 4.68289500  | 0.24648800  | 0.63387000  |

Coordinates for Cy-FN (excited state)

|   |             |             |             |
|---|-------------|-------------|-------------|
| C | -7.17928600 | -0.85946200 | -0.06949600 |
| C | -6.63601600 | 0.34328900  | -0.51115700 |
| C | -7.46879400 | 1.41155400  | -0.79566900 |
| C | -8.84466100 | 1.24721600  | -0.62386900 |
| C | -9.37198200 | 0.03375800  | -0.17525800 |

|   |              |             |             |
|---|--------------|-------------|-------------|
| C | -8.54393100  | -1.04811700 | 0.11133100  |
| C | -4.93725400  | -1.23252600 | -0.12531300 |
| C | -5.13153100  | 0.21217600  | -0.59474700 |
| H | -7.06712000  | 2.35519400  | -1.14351800 |
| H | -9.51275500  | 2.07135700  | -0.84005800 |
| H | -10.44172000 | -0.07074600 | -0.04635800 |
| H | -8.95797600  | -1.98292700 | 0.46262500  |
| N | -6.12701700  | -1.78139300 | 0.13778500  |
| C | -6.37943000  | -3.15415900 | 0.61730700  |
| H | -7.34616500  | -3.44854800 | 0.21490200  |
| H | -5.63771500  | -3.81084100 | 0.17049100  |
| C | -6.36883100  | -3.25035400 | 2.14033900  |
| H | -7.12802700  | -2.60402000 | 2.58171700  |
| H | -6.58531900  | -4.28037900 | 2.42697900  |
| H | -5.39449800  | -2.97655700 | 2.54641800  |
| C | -4.45424800  | 1.22936500  | 0.35338100  |
| H | -3.36869900  | 1.17571500  | 0.29680700  |
| H | -4.75834800  | 2.23436800  | 0.05995500  |
| H | -4.75960800  | 1.06326400  | 1.38715400  |
| C | -4.65769300  | 0.39690200  | -2.05617000 |
| H | -4.93261500  | 1.39811300  | -2.38926800 |
| H | -3.57744400  | 0.29305500  | -2.14333400 |

|   |             |             |             |
|---|-------------|-------------|-------------|
| H | -5.13341800 | -0.33069400 | -2.71489500 |
| C | 7.09863400  | -0.88234400 | 0.14343800  |
| C | 6.57483100  | 0.31602700  | -0.33321000 |
| C | 7.42200700  | 1.37253400  | -0.61893300 |
| C | 8.79312400  | 1.19894300  | -0.42032200 |
| C | 9.30154900  | -0.01200800 | 0.05617300  |
| C | 8.45861900  | -1.08068600 | 0.34866400  |
| C | 4.85567200  | -1.23905900 | 0.04382300  |
| C | 5.07110600  | 0.19631700  | -0.44370000 |
| H | 7.03499600  | 2.31368400  | -0.98940100 |
| H | 9.47240200  | 2.01335500  | -0.63855500 |
| H | 10.36831200 | -0.12517000 | 0.20141700  |
| H | 8.85883700  | -2.01622000 | 0.71403500  |
| N | 6.03299800  | -1.78491800 | 0.36409500  |
| C | 6.26386900  | -3.15891100 | 0.85093000  |
| H | 7.12827800  | -3.11294600 | 1.50940600  |
| H | 5.41365800  | -3.44809700 | 1.46285600  |
| C | 6.49481300  | -4.14697800 | -0.28935600 |
| H | 7.36025100  | -3.86321200 | -0.88899700 |
| H | 6.67972300  | -5.13445200 | 0.13559500  |
| H | 5.62122000  | -4.20845900 | -0.93930700 |
| C | 4.62815400  | 0.36380700  | -1.91663300 |

|   |             |             |             |
|---|-------------|-------------|-------------|
| H | 4.91684100  | 1.35835600  | -2.25805100 |
| H | 5.11176100  | -0.37609900 | -2.55557100 |
| H | 3.54918200  | 0.26611200  | -2.02404100 |
| C | 4.38156300  | 1.23110800  | 0.47634800  |
| H | 4.69616000  | 2.23028300  | 0.17415000  |
| H | 3.29698600  | 1.18146000  | 0.39932800  |
| H | 4.66619500  | 1.07843500  | 1.51808600  |
| C | -0.04235600 | -4.40091800 | -0.12271600 |
| C | 1.20972100  | -3.68343900 | 0.37356600  |
| C | 1.19875100  | -2.21787000 | 0.02304100  |
| C | -0.03934900 | -1.58284600 | -0.14855900 |
| C | -1.28251200 | -2.21531100 | -0.01889400 |
| C | -1.30735400 | -3.68013900 | 0.33445800  |
| H | -0.02548600 | -4.44601100 | -1.21525100 |
| H | 1.28374900  | -3.77557200 | 1.46422400  |
| C | -3.73486100 | -1.95977000 | 0.03290700  |
| H | -3.82989900 | -2.97757900 | 0.38082600  |
| C | -2.47096400 | -1.46709900 | -0.19159900 |
| H | -2.35502700 | -0.44477500 | -0.51334300 |
| H | -2.18398400 | -4.15520600 | -0.10568300 |
| H | -1.41434500 | -3.77037900 | 1.42249800  |
| H | -0.04935900 | -5.42795600 | 0.24428100  |

|   |             |             |             |
|---|-------------|-------------|-------------|
| H | 2.09815700  | -4.15972500 | -0.04085200 |
| C | 2.39228300  | -1.46990900 | -0.10474900 |
| H | 2.28835700  | -0.44470800 | -0.42165300 |
| C | 3.64836200  | -1.96567200 | 0.15689000  |
| H | 3.73315500  | -2.98971700 | 0.48814900  |
| C | -0.00704900 | 2.09980600  | -0.01552800 |
| C | 0.13459400  | 3.09751500  | 0.95325700  |
| C | 0.19785500  | 4.44788600  | 0.60169800  |
| C | 0.10973300  | 4.80882200  | -0.75636800 |
| C | -0.03567700 | 3.83021700  | -1.72181500 |
| C | -0.09004100 | 2.49308800  | -1.35772400 |
| H | 0.20169400  | 2.81596300  | 1.99152700  |
| H | 0.15530600  | 5.85042200  | -1.03452100 |
| H | -0.10827200 | 4.09150900  | -2.76954400 |
| F | -0.24147300 | 1.58625500  | -2.35593700 |
| N | 0.35357400  | 5.42690900  | 1.59105800  |
| O | 0.43576800  | 5.07200900  | 2.83404600  |
| O | 0.41032400  | 6.67415800  | 1.24588800  |
| C | -0.05244300 | 0.70710400  | 0.48803900  |
| O | -0.09315400 | 0.39809700  | 1.65497100  |
| O | -0.02855100 | -0.23042300 | -0.50880500 |



Coordinates for Keto-Cy (excited state)

|   |             |             |             |
|---|-------------|-------------|-------------|
| C | 7.20104300  | -0.14968900 | 0.23666800  |
| C | 6.67657800  | -1.44477100 | 0.12559100  |
| C | 7.52460300  | -2.53539700 | 0.10281000  |
| C | 8.90691500  | -2.32570000 | 0.18784500  |
| C | 9.41758000  | -1.03035900 | 0.29378800  |
| C | 8.57620700  | 0.07992200  | 0.31883500  |
| C | 4.93175800  | 0.14630500  | 0.12432400  |
| C | 5.16246400  | -1.36916600 | 0.05127900  |
| H | 7.13050800  | -3.54160700 | 0.01947100  |
| H | 9.58284500  | -3.17152200 | 0.16919200  |
| H | 10.48881800 | -0.88056100 | 0.35480400  |
| H | 8.98509900  | 1.07847200  | 0.39375800  |
| N | 6.15999300  | 0.77050500  | 0.24946800  |
| C | 6.37767300  | 2.21384300  | 0.33531300  |
| C | 6.48926400  | 2.88847800  | -1.03276000 |
| H | 7.28998100  | 2.36922200  | 0.90987300  |
| H | 5.56343700  | 2.64704400  | 0.91496800  |
| H | 6.65956600  | 3.95813600  | -0.89605400 |
| H | 7.32421900  | 2.47833400  | -1.60293200 |
| H | 5.57439100  | 2.75770600  | -1.61204600 |
| C | 4.52929200  | -2.11164500 | 1.25160400  |
| C | 4.66150700  | -1.97149900 | -1.28210800 |
| C | -7.21283500 | -0.13312200 | -0.03208500 |
| C | -6.68512500 | -1.43021000 | -0.09152600 |
| C | -7.53226900 | -2.52164800 | -0.11173500 |
| C | -8.91634300 | -2.31084700 | -0.06842500 |
| C | -9.42979100 | -1.01387000 | -0.00408500 |
| C | -8.58940300 | 0.09719600  | 0.01680500  |

|   |              |             |             |
|---|--------------|-------------|-------------|
| C | -4.94110500  | 0.16212700  | -0.07799900 |
| C | -5.16960400  | -1.35473200 | -0.12771300 |
| H | -7.13620100  | -3.52936900 | -0.15991400 |
| H | -9.59143900  | -3.15741900 | -0.08320300 |
| H | -10.50210300 | -0.86378000 | 0.03241000  |
| H | -8.99925600  | 1.09652300  | 0.07339000  |
| N | -6.17350300  | 0.78905900  | -0.03841700 |
| C | -6.39386200  | 2.23286600  | 0.02879700  |
| C | -6.39729300  | 2.77690200  | 1.45798500  |
| H | -7.34781700  | 2.43684700  | -0.45613100 |
| H | -5.62653100  | 2.72248100  | -0.56962700 |
| H | -6.57723200  | 3.85345200  | 1.43456300  |
| H | -7.18548800  | 2.31088600  | 2.05141000  |
| H | -5.43996200  | 2.59983300  | 1.95008600  |
| C | -4.63275400  | -1.97933800 | -1.43710000 |
| C | -4.56913400  | -2.07596700 | 1.10157900  |
| C | 0.01292500   | 3.15320000  | -0.68094400 |
| C | -1.24828300  | 2.55401400  | -0.06988200 |
| C | -1.25427000  | 1.04579800  | -0.13168000 |
| C | -0.00097500  | 0.30575100  | -0.16592100 |
| C | 1.25299700   | 1.04060300  | -0.08568000 |
| C | 1.25218600   | 2.54929000  | -0.03095100 |
| H | 0.02916200   | 2.95116600  | -1.75724000 |
| H | -1.32298100  | 2.87982300  | 0.97796600  |
| H | 1.29824700   | 2.87873700  | 1.01746600  |
| O | -0.00228500  | -0.97872800 | -0.23587400 |
| C | -2.44717100  | 0.32300700  | -0.12866500 |
| C | -3.74803900  | 0.86423600  | -0.07286500 |
| C | 3.74113400   | 0.85077400  | 0.07458700  |
| C | 2.44187900   | 0.31301300  | -0.02986100 |

|   |             |             |             |
|---|-------------|-------------|-------------|
| H | 3.57638800  | -1.91580000 | -1.36067600 |
| H | 5.09849000  | -1.44756000 | -2.13376000 |
| H | 4.95374900  | -3.02187400 | -1.33737200 |
| H | 3.44200900  | -2.04716000 | 1.22856600  |
| H | 4.80996200  | -3.16606100 | 1.21475700  |
| H | 4.88181300  | -1.69427500 | 2.19619800  |
| H | 3.82590300  | 1.92910900  | 0.11985200  |
| H | 2.32103800  | -0.76000000 | -0.06571700 |
| H | 2.15065400  | 2.94651900  | -0.50865300 |
| H | 0.01318100  | 4.23927700  | -0.55544300 |
| H | -2.13027600 | 2.95791900  | -0.57208500 |
| H | -2.32868000 | -0.75003900 | -0.17100200 |
| H | -3.83186800 | 1.94213700  | -0.01561200 |
| H | -5.05037500 | -1.47314400 | -2.30897200 |
| H | -3.54626800 | -1.91910600 | -1.48921700 |
| H | -4.91870800 | -3.03200900 | -1.48018900 |
| H | -4.85104700 | -3.13038400 | 1.07663600  |
| H | -3.48156000 | -2.01413600 | 1.10616000  |
| H | -4.94529500 | -1.64113200 | 2.02899500  |
